# Supplementary material for: Production of Novel Polygalacturonase from Bacillus paralicheniformis CBS32 and Application to Depolymerization of Ramie Fiber
Source: PubMed Central journal article supplement (PMC6780255; doi:10.3390/polym11091525), 2019-09-19
Supplement: polymers-11-01525-s001.pdf [file polymers-11-01525-s001.pdf]

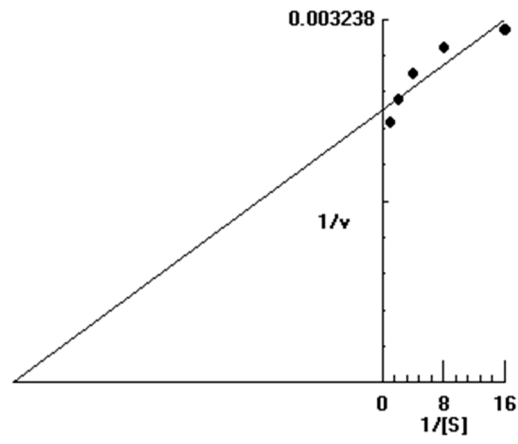

Figure S1. Lineweaver–Burk Plot.

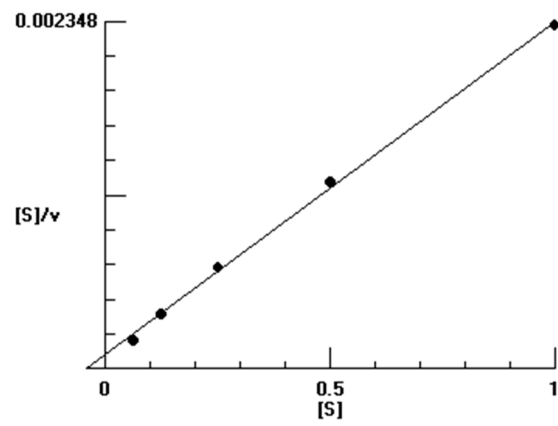

Figure S2. Hanes–Woolf Plot.

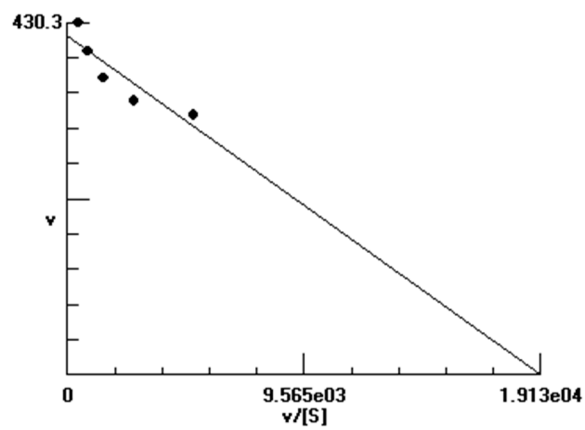

Figure S3. Eadie–Hofstee Plot.
